# Supplementary material for: Assessment of spatial and temporal variations in trace element concentrations using honeybees (Apis mellifera) as bioindicators
Source: PeerJ. 2018 Jul 16;6:e5197. doi: 10.7717/peerj.5197 (PMC6052853; doi:10.7717/peerj.5197)
Supplement: Data S1 [file peerj-06-5197-s002.xlsx]

## Sheet: Sheet1
Location	Month	Year	As	Cs	Hg	Mo	Sb	Se	U	V
PA	jun	2015	0.040488	0.0112052	-	0.241235	0.00986056	0.0721614	0.00116534	0.0336155
PA	jun	2015	0.0111034	0.0279825	0.00801633	0.225702	0.017377	0.0573093	0.00110536	0.0733918
PA	jul	2015	0.255515	1.20888	-	0.811272	0.00867429	0.125351	0.0138237	0.0621239
PA	jul	2015	0.0776104	0.0709839	-	0.241014	0.0107932	0.123243	0.000657631	0.0289157
PA	avgust	2015	0.0558325	0.0204387	-	0.227866	0.00777667	0.0995513	-	0.0307079
PA	avgust	2015	0.0338123	0.0416499	0.00356712	0.200261	0.0079381	0.0612942	0.000552653	0.0301949
PV	jun	2015	0.321282	0.016359	-	0.635385	0.927692	0.462462	0.00230769	0.168051
PV	jun	2015	0.17944	0.0318434	0.0119165	0.424001	0.0178006	0.293265	0.00370847	0.22058
PV	jul	2015	0.232296	0.0376521	-	0.393976	0.0135149	0.306004	0.0145123	0.381558
PV	jul	2015	0.250452	0.0184776	-	0.333702	0.0229464	0.323057	0.00617594	0.080488
PV	avgust	2015	0.0996105	0.0253146	-	0.384462	0.017825	0.258438	0.00247653	0.145446
PV	avgust	2015	0.12606	0.0304804	-	0.197618	0.023264	0.213868	0.00152907	0.0394631
PV	september	2015	0.0899523	0.177969	0.00848888	0.55699	0.0066521	0.24444	0.00754567	0.11805
PV	september	2015	0.07343	0.0496324	-	0.322486	0.00849563	0.270767	0.00272754	0.0821244
MS	jul	2014	0.169999	0.0341583	0.0515443	0.321129	0.0201473	0.108355	0.00510329	0.111398
MS	jul	2014	0.220799	0.0172011	0.00114167	0.2877	0.0235945	0.0779379	0.0053151	0.119621
BG	jul	2014	0.539848	0.0242132	0.0811421	0.902284	0.0808629	0.36802	0.00753807	0.16797
BG	jul	2014	0.411759	0.0360415	0.0585926	1.22672	0.0555975	0.357143	0.00991644	0.224303
BG	jul	2014	0.18425	0.0208081	0.0551693	0.549678	0.0501562	0.153995	0.00523982	0.258968
BG	jul	2014	0.18712	0.0248381	0.121998	1.08869	0.063702	0.175087	0.0068012	0.34579
BG	september	2014	0.13598	0.0298812	0.0766542	0.553355	0.0325606	0.158056	0.00235322	0.200373
BG	september	2014	0.20466	0.0245311	0.0274326	0.767585	0.0309496	0.184525	0.00123388	0.19789
TPP	jul	2014	0.309383	0.130826	0.124949	0.55745	0.0232292	0.45517	0.0247074	0.722827
TPP	jul	2014	0.262931	0.0273114	0.019226	0.45087	0.0188248	0.293822	0.0139798	0.39779
TPP	jul	2014	0.70616	0.0705647	0.00597007	3.14133	0.0257251	0.580353	0.0177565	1.00569
TPP	jul	2014	0.740647	0.0267921	0.0580452	0.625824	0.0217986	0.250025	0.0119842	0.282622
TPP	avgust	2014	0.385136	0.0554902	0.0165058	0.483112	0.0160645	0.329822	0.0208986	0.809698
TPP	avgust	2014	0.245824	0.0313088	0.0430357	0.48595	0.0219051	0.322215	0.0101781	0.450271
TPP	avgust	2014	0.120553	0.0277363	0.0466418	0.574938	0.0165112	0.497823	0.00652052	0.0967973
PA	jul	2014	0.0749037	0.0227549	0.164555	0.33058	0.0158119	0.167292	0.000613217	0.128167
PA	jul	2014	0.104491	0.0338392	0.036813	0.440525	0.0105107	0.156327	0.00279943	0.27784
PA	jul	2014	0.177335	0.0145029	-	0.721144	0.0175035	0.194789	0.00220544	0.194789
PA	jul	2014	0.198189	0.0227087	0.0595336	0.629092	0.0281301	0.277568	0.00253171	0.280432
PA	avgust	2014	0.26429	0.0239889	0.13279	0.769707	0.0352352	0.268211	0.00462753	0.373298
PA	avgust	2014	0.317868	0.0426764	0.109162	0.848214	0.037415	0.350446	0.00317283	0.29459
PA	avgust	2014	0.309257	0.0482706	0.251729	0.502391	0.0349949	0.365615	0.00427263	0.236572
PA	avgust	2014	0.202856	0.0373669	0.0699734	0.306255	0.0192465	0.186527	0.00117731	0.250307
PV	avgust	2014	0.111648	0.00999334	0.191928	0.820564	0.0314235	0.18199	0.0017877	0.16328
PV	avgust	2014	0.387579	0.0135342	0.172779	1.27592	0.0147893	0.349869	0.00401659	0.280943
PV	jul	2014	0.129966	0.0169444	0.0692003	0.758053	0.00891678	0.152398	0.002327	0.185423
PV	jul	2014	0.133328	0.0128694	0.0271952	0.458638	0.0104332	0.14069	0.00387936	0.141722
